# Supplementary material
Source: MDPI journal article supplement (https://www.mdpi.com/2225-1154/10/2/14)

## Article

# The potential global climate suitability of Kiwifruit bacterial canker disease (*Pseudomonas syringae* pv. *actinidiae*, Psa) using three modelling approaches: CLIMEX, MaxEnt and Multi-Model Framework

**Table S1.** The geographic coordinates of locations of Psa. Some presence data such as Australian points are excluded as they are now known to be a different pathovar.

| Species | x        | y        | Species | x       | y      | Species | x       | y       |
|---------|----------|----------|---------|---------|--------|---------|---------|---------|
| psa     | 102.5    | 30.5     | psa     | 108.41  | 30.97  | psa     | 6.08    | 46.12   |
| psa     | 103.59   | 30.95    | psa     | 107.01  | 29.31  | psa     | 8.01427 | 47.0002 |
| psa     | 105.447  | 32.11    | psa     | 112     | 28     | psa     | 1       | 44.35   |
| psa     | 105.886  | 32.107   | psa     | 110.7   | 29.92  | psa     | 5.22    | 45.28   |
| psa     | 106.2503 | 31.9858  | psa     | 111.56  | 25.19  | psa     | -0.33   | 47.28   |
| psa     | 105.1483 | 28.124   | psa     | 117     | 32     | psa     | -0.04   | 46.1    |
| psa     | 104.55   | 31.774   | psa     | 116.46  | 31.02  | psa     | 1.3     | 43.45   |
| psa     | 104.38   | 30.99    | psa     | 106.48  | 26.93  | psa     | 1.45    | 47.3    |
| psa     | 103.044  | 30.126   | psa     | 104.85  | 26.59  | psa     | 5.36    | 44.88   |
| psa     | 106.597  | 31.752   | psa     | 119.93  | 33.45  | psa     | 5.46    | 43.27   |
| psa     | 107.147  | 31.927   | psa     | 109.73  | 30.6   | psa     | 1.42    | 45.46   |
| psa     | 107.465  | 32.055   | psa     | 138.11  | 34.78  | psa     | -0.37   | 48.18   |
| psa     | 103.9462 | 28.8766  | psa     | 139.43  | 35.31  | psa     | 2       | 46      |
| psa     | 103.3511 | 30.213   | psa     | 135.2   | 34.22  | psa     | -8.12   | 41.11   |
| psa     | 102.8957 | 32.0205  | psa     | 140.07  | 35.36  | psa     | -8.3    | 40.57   |
| psa     | 103.7956 | 31.13314 | psa     | 141.56  | 43.36  | psa     | -8.38   | 42.01   |
| psa     | 104.933  | 28.915   | psa     | 139.35  | 35.51  | psa     | -8.24   | 41.37   |
| psa     | 107.44   | 34.16    | psa     | 139.25  | 35.22  | psa     | -8.39   | 41.08   |
| psa     | 108.05   | 34.16    | psa     | 141.347 | 43.064 | psa     | -8      | 39.5    |
| psa     | 108.54   | 33.93    | psa     | 139.75  | 35.68  | psa     | 11.45   | 45.3    |
| psa     | 107.63   | 34.44    | psa     | 130.12  | 33.22  | psa     | 15.39   | 38.06   |
| psa     | 109      | 36       | psa     | 127     | 34.45  | psa     | 10.59   | 44.32   |
| psa     | 109.01   | 33.9     | psa     | 126.38  | 35.11  | psa     | 12.06   | 42.25   |
| psa     | 109.68   | 34.19    | psa     | 126.36  | 33.23  | psa     | 7.32    | 44.23   |
| psa     | 107.11   | 33.14    | psa     | 126.56  | 34.42  | psa     | 8.25    | 45.19   |
| psa     | 120.19   | 30.31    | psa     | 127.03  | 37.58  | psa     | 7.23    | 44.39   |
| psa     | 118.82   | 28.81    | psa     | 126.28  | 34.59  | psa     | 8.12    | 44.54   |
| psa     | 120.08   | 27.59    | psa     | 127.29  | 34.56  | psa     | 8.15    | 43.98   |
| psa     | 121.5    | 29.36    | psa     | 128.15  | 35.15  | psa     | 13      | 46      |

|     |          |          |     |          |          |     |          |          |
|-----|----------|----------|-----|----------|----------|-----|----------|----------|
| psa | 121.11   | 30.07    | psa | 20.7     | 39.55    | psa | 14.46    | 40.91    |
| psa | 120.5    | 30.62    | psa | 13.54    | 45.72    | psa | 12.8333  | 42.8333  |
| psa | 119.17   | 28.7     | psa | 15.167   | 46.25    | psa | -8.38    | 42.25    |
| psa | 111.27   | 33.65    | psa | 14.3     | 45.39    | psa | -7.51    | 42.45    |
| psa | 108.22   | 31.24    | psa | 40.21    | 40.91    | psa | 11.34    | 48.08    |
| psa | 9.45     | 54.12    | psa | 108.6    | 34.1     | psa | 7.62063  | 44.68735 |
| psa | 176.15   | -37.8    | psa | 108.22   | 34.16    | psa | 7.551743 | 44.32911 |
| psa | 175.55   | -37.33   | psa | 106.74   | 31.86    | psa | 7.486574 | 44.56565 |
| psa | 175.65   | -38.21   | psa | 106.55   | 29.56    | psa | 7.411407 | 44.8747  |
| psa | 177.08   | -38.1    | psa | 106.2642 | 26.21513 | psa | 7.324214 | 44.72528 |
| psa | 175.87   | -37.46   | psa | 105.93   | 31.73    | psa | 5.283125 | 46.24749 |
| psa | 172.88   | -41.05   | psa | 105.59   | 30.53    | psa | 1.52     | 44.08    |
| psa | 138      | 36       | psa | 104.67   | 31.46    | psa | -0.29958 | 44.70022 |
| psa | 133.5    | 33.75    | psa | 104.0759 | 30.65165 | psa | -0.3     | 45.9     |
| psa | 131      | 33       | psa | 103.59   | 31.47    | psa | -0.32    | 47.76    |
| psa | 126.991  | 34.8679  | psa | 103.46   | 30.41    | psa | -5.43333 | 43.48333 |
| psa | 125      | 39.8     | psa | 101.54   | 25.47    | psa | -6.06973 | 43.38855 |
| psa | 120.46   | 33.195   | psa | 16.01181 | 38.35729 | psa | -8.4     | 41.62    |
| psa | 119.04   | 35.128   | psa | 13.93376 | 41.24189 | psa | -8.58    | 40.92    |
| psa | 117.94   | 28.45    | psa | 13.05889 | 41.49864 | psa | -8.64    | 42.02    |
| psa | 117.2849 | 31.86115 | psa | 13.05788 | 41.80601 | psa | -9.15158 | 38.75653 |
| psa | 117.05   | 30.52    | psa | 13.02467 | 41.29994 | psa | -71.0022 | -34.5755 |
| psa | 116.52   | 31.73    | psa | 12.91568 | 41.64256 | psa | -71.5724 | -35.5164 |
| psa | 116.35   | 30.84    | psa | 12.88454 | 41.83537 | psa | 174.6    | -39.53   |
| psa | 114.48   | 29.6     | psa | 12.71493 | 41.71968 | psa | 174.6    | -36.24   |
| psa | 114.17   | 22.39    | psa | 12.66108 | 41.45759 | psa | 176.33   | -37.98   |
| psa | 113.73   | 26.74    | psa | 12.649   | 41.932   | psa | 174.28   | -35.43   |
| psa | 113.12   | 29.35    | psa | 12.51546 | 41.6118  | psa | 174.88   | -36.78   |
| psa | 113.01   | 25.77    | psa | 12.25039 | 42.48713 |     |          |          |
| psa | 112.93   | 28.22    | psa | 12.15639 | 45.67763 |     |          |          |
| psa | 112.52   | 27.91    | psa | 12.0903  | 42.62723 |     |          |          |
| psa | 112.1924 | 27.45914 | psa | 12.00393 | 45.78628 |     |          |          |
| psa | 111.69   | 29.03    | psa | 11.88299 | 44.28535 |     |          |          |
| psa | 111.38   | 29.58    | psa | 11.811   | 45.542   |     |          |          |
| psa | 111.28   | 30.69    | psa | 11.13719 | 45.37561 |     |          |          |
| psa | 111.2    | 34.77    | psa | 11.119   | 44.547   |     |          |          |
| psa | 110.79   | 32.62    | psa | 10.84342 | 45.35085 |     |          |          |
| psa | 110.47   | 29.11    | psa | 9.01     | 42.03    |     |          |          |
| psa | 110.165  | 29.4     | psa | 8.173759 | 45.36737 |     |          |          |
| psa | 109.79   | 30.29    | psa | 8.006889 | 45.44737 |     |          |          |
| psa | 109.69   | 28.26    | psa | 7.851    | 44.948   |     |          |          |

---

|     |        |       |     |          |          |  |  |  |
|-----|--------|-------|-----|----------|----------|--|--|--|
| psa | 109.42 | 33.91 | psa | 7.79315  | 44.57865 |  |  |  |
| psa | 109.03 | 34.34 | Psa | 7.710063 | 44.42313 |  |  |  |

**Table S2.** The accuracy measures achieved by cross-validation (A) and bootstrapping (B) in Multi-Model Framework developed for Psa. Acronyms for models are: QDA= quadratic discriminant analysis, NB= naïve Bayes, LDA= linear discriminant analysis, , LOG= logistic regression, CART= classification and regression tree, CTREE= conditional tree, KNN= K-nearest neighbour, SVM= support vector machine, and NNET= neural network.

| Model        | Accuracy | rank1 | Precision | rank2 | Recall   | rank3 | F.score  | rank4 | Kappa    | rank5 | Specificity | rank6 | TSS      | rank7 | Uncertainty | rank8 | CV.error | rank9 | AUC     | rank10 |
|--------------|----------|-------|-----------|-------|----------|-------|----------|-------|----------|-------|-------------|-------|----------|-------|-------------|-------|----------|-------|---------|--------|
| <b>SVM</b>   | 0.971429 | 1     | 0.961818  | 2     | 0.977778 | 1     | 0.968185 | 1     | 0.942099 | 1     | 0.965152    | 2     | 0.942929 | 1     | 0.034483    | 3     | 0.06482  | 1     | 0.97185 | 1      |
| <b>NB</b>    | 0.942857 | 4     | 0.944444  | 3     | 0.935556 | 5     | 0.939117 | 5     | 0.880989 | 5     | 0.93658     | 4     | 0.872136 | 6     | 0.011494    | 1     | 0.090316 | 2     | 0.9704  | 2      |
| <b>CTREE</b> | 0.942857 | 4     | 0.926667  | 5     | 0.957778 | 4     | 0.939527 | 4     | 0.885084 | 3     | 0.928788    | 6     | 0.886566 | 4     | 0.017241    | 2     | 0.093064 | 3     | 0.95534 | 3      |
| <b>NNET</b>  | 0.952381 | 2     | 0.941818  | 4     | 0.965714 | 2.5   | 0.952542 | 2     | 0.902946 | 2     | 0.94697     | 3     | 0.912684 | 2     | 0.143678    | 7     | 0.093511 | 4     | 0.95283 | 4      |
| <b>KNN</b>   | 0.942857 | 4     | 0.925455  | 6     | 0.965714 | 2.5   | 0.942016 | 3     | 0.884112 | 4     | 0.931818    | 5     | 0.897532 | 3     | 0.08046     | 6     | 0.107642 | 6     | 0.93922 | 5      |
| <b>LOG</b>   | 0.933333 | 6     | 0.963636  | 1     | 0.906984 | 7     | 0.929089 | 6     | 0.862984 | 6     | 0.966667    | 1     | 0.873651 | 5     | 0.068966    | 5     | 0.10824  | 7     | 0.9265  | 6      |
| <b>CART</b>  | 0.895238 | 7     | 0.884957  | 7     | 0.923492 | 6     | 0.899353 | 7     | 0.7804   | 7     | 0.853463    | 7     | 0.776955 | 8     | 0.057471    | 4     | 0.10657  | 5     | 0.90500 | 7      |
| <b>QDA</b>   | 0.880476 | 8     | 0.875513  | 8     | 0.900715 | 8     | 0.890399 | 8     | 0.758041 | 8     | 0.821349    | 8     | 0.792838 | 7     | 0.009524    | 8     | 0.148303 | 8     | 0.87112 | 8      |
| <b>LDA</b>   | 0.828571 | 9     | 0.81978   | 9     | 0.862777 | 9     | 0.837515 | 9     | 0.645442 | 9     | 0.793727    | 9     | 0.656504 | 9     | 0.009524    | 4     | 0.155317 | 9     | 0.80818 | 9      |

#### A. Cross-Validation

#### B. Bootstrap

| Model        | Accuracy | rank1 | Precision | rank2 | Recall   | rank3 | F.score  | rank4 | Kappa    | rank5 | Specificity | rank6 | TSS      | rank7 | Uncertainty | rank8 | X.632..error | rank9 | AUC      | rank10 |
|--------------|----------|-------|-----------|-------|----------|-------|----------|-------|----------|-------|-------------|-------|----------|-------|-------------|-------|--------------|-------|----------|--------|
| <b>SVM</b>   | 0.909494 | 3     | 0.899604  | 4     | 0.924558 | 4     | 0.910323 | 4     | 0.817627 | 3     | 0.895       | 4     | 0.819559 | 3     | 0.04023     | 1     | 0.085646     | 4     | 0.978729 | 1      |
| <b>KNN</b>   | 0.929329 | 1     | 0.903224  | 2     | 0.96369  | 1     | 0.931242 | 1     | 0.857652 | 1     | 0.895541    | 3     | 0.859231 | 1     | 0.063218    | 2.5   | 0.106311     | 8     | 0.977408 | 2      |
| <b>NB</b>    | 0.921106 | 2     | 0.903412  | 1     | 0.945285 | 2     | 0.922405 | 2     | 0.841048 | 2     | 0.897631    | 2     | 0.842916 | 2     | 0.091954    | 4     | 0.059122     | 1     | 0.973841 | 3      |
| <b>NNET</b>  | 0.902943 | 5     | 0.901091  | 3     | 0.90856  | 5     | 0.902624 | 5     | 0.804501 | 5     | 0.898041    | 1     | 0.806601 | 5     | 0.132184    | 5     | 0.062495     | 2     | 0.969084 | 4      |
| <b>CTREE</b> | 0.884555 | 7     | 0.892112  | 5     | 0.883301 | 7     | 0.883327 | 7     | 0.7681   | 7     | 0.888166    | 5     | 0.771468 | 7     | 0.195402    | 7     | 0.097353     | 7     | 0.96631  | 5      |
| <b>LOG</b>   | 0.908667 | 4     | 0.887556  | 6     | 0.93863  | 3     | 0.910829 | 3     | 0.816098 | 4     | 0.880214    | 7     | 0.818844 | 4     | 0.063218    | 2.5   | 0.086317     | 5     | 0.958647 | 6      |

---

|             |          |   |          |   |          |   |          |   |          |   |          |   |          |   |          |   |          |   |          |   |
|-------------|----------|---|----------|---|----------|---|----------|---|----------|---|----------|---|----------|---|----------|---|----------|---|----------|---|
| <b>CART</b> | 0.887205 | 6 | 0.887339 | 7 | 0.893166 | 6 | 0.886648 | 6 | 0.773134 | 6 | 0.882547 | 6 | 0.775713 | 6 | 0.137931 | 6 | 0.091567 | 6 | 0.957987 | 7 |
| <b>QDA</b>  | 0.8542   | 8 | 0.866853 | 8 | 0.881206 | 8 | 0.87463  | 8 | 0.74045  | 8 | 0.862905 | 8 | 0.741117 | 8 | 0.240476 | 9 | 0.075225 | 7 | 0.944705 | 8 |
| <b>LDA</b>  | 0.853113 | 9 | 0.825402 | 9 | 0.823547 | 9 | 0.85728  | 9 | 0.705827 | 9 | 0.814089 | 9 | 0.707636 | 9 | 0.219524 | 8 | 0.144015 | 9 | 0.910952 | 9 |

**Figure S1.** Receiver operating characteristic (ROC) curve produced by MaxEnt for Psa.

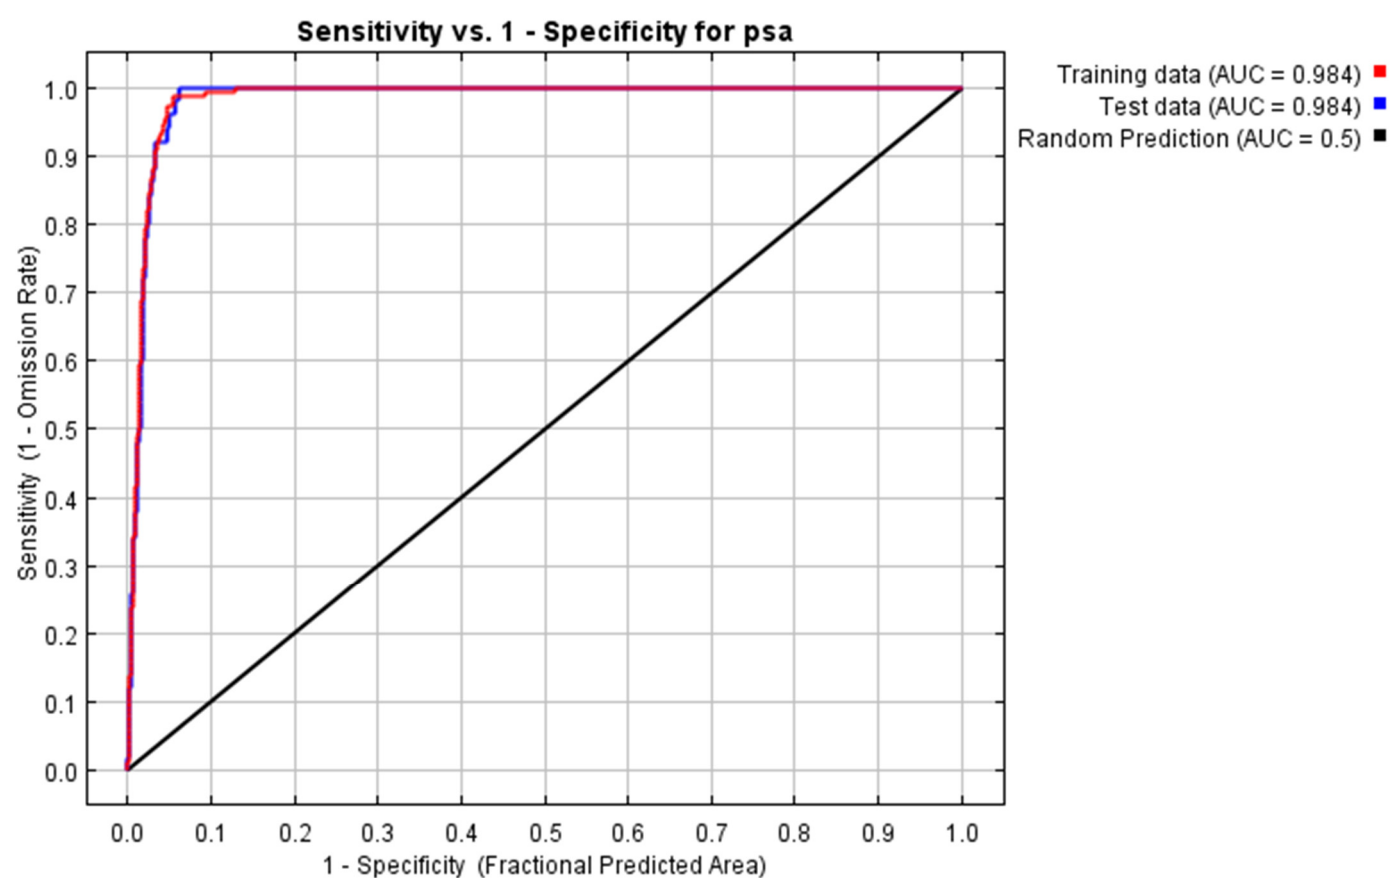

**Figure S2** The jackknife of regularized training gain showing the variable importance predicted by MaxEnt.

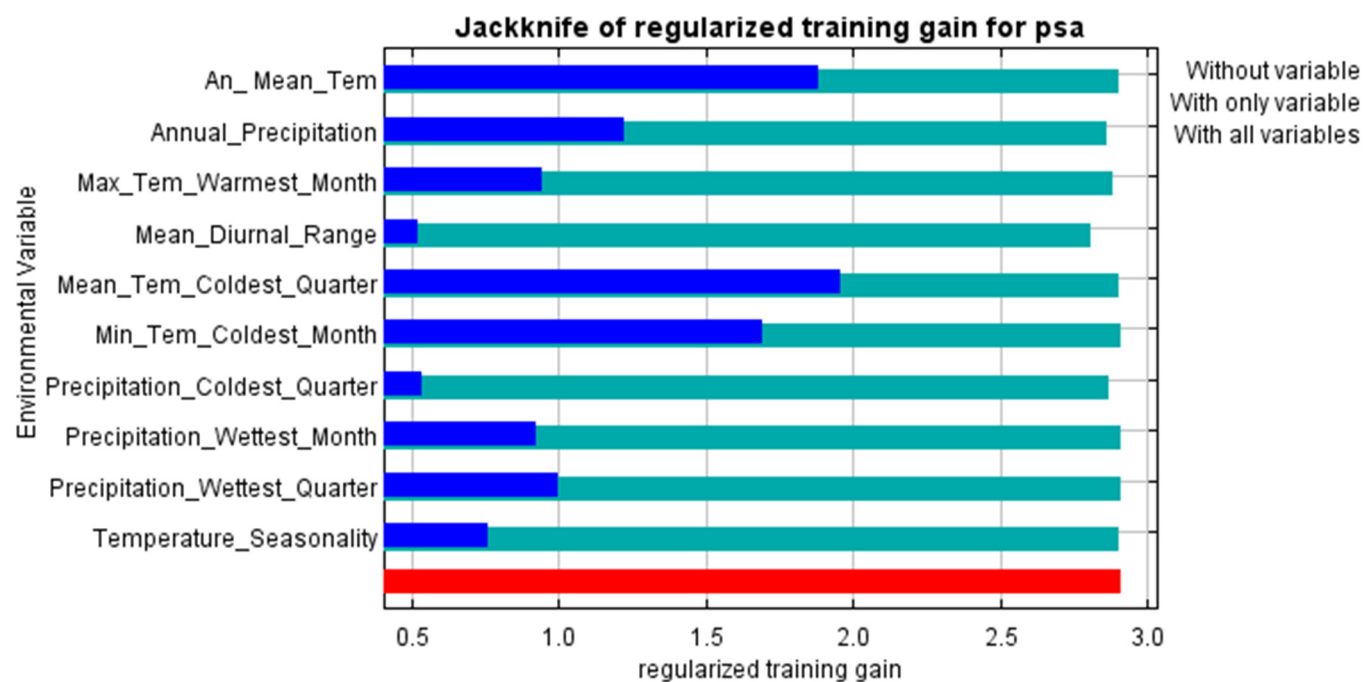

Supplement: s1 [file s1]
